# Supplementary material
Source: publisher site journal article supplement (https://www.dovepress.com/article/369020)
Supplement: Supplementary file 1 [file get_supplementary_file.php]

**Hypotheses of the Study**

H1: The COVID-19 pandemic has negative impacts on physical health

H2: The COVID-19 pandemic negatively influences the psychological health

H3: The COVID-19 pandemic negatively impacted the overall well-being

H4: The physical exercise negatively influenced by the COVID-19 Pandemic

H5: The physical health negatively influenced by the preventive measures of the COVID-19

H6: The preventive measures of the COVID-19 have negative impacts on the psychological health

H7: The overall well-being affected negatively by the COVID-19 preventive measures

H8: The prevent

H9: There is a positive effect of virtual reality fitness on physical health during the COVID-19 pandemic

H10: The virtual reality fitness has a positive association with psychological health during the COVID-19 pandemic

H11: The overall well-being impacted positively by the virtual reality fitness during the COVID-19 pandemic

H12: Virtual reality fitness improves physical exercise positively during the COVID-19 pandemic

H13: Virtual reality fitness plays a mediating role between preventive measures of the COVID-19 and physical health

H14: Virtual reality fitness plays a mediating role between preventive measures for the COVID-19 and psychological health

H15: Virtual reality fitness plays a mediating role between preventive measures of the COVID-19 and overall well-being

H16: Virtual reality fitness plays a mediating role between preventive measures of the COVID-19 and physical exercise
